# Supplementary material
Source: PubMed Central journal article supplement (PMC5580398)
Supplement: NIHMS883965-supplement-1-combined_supplemental_figures.pdf [file NIHMS883965-supplement-1-combined_supplemental_figures.pdf]

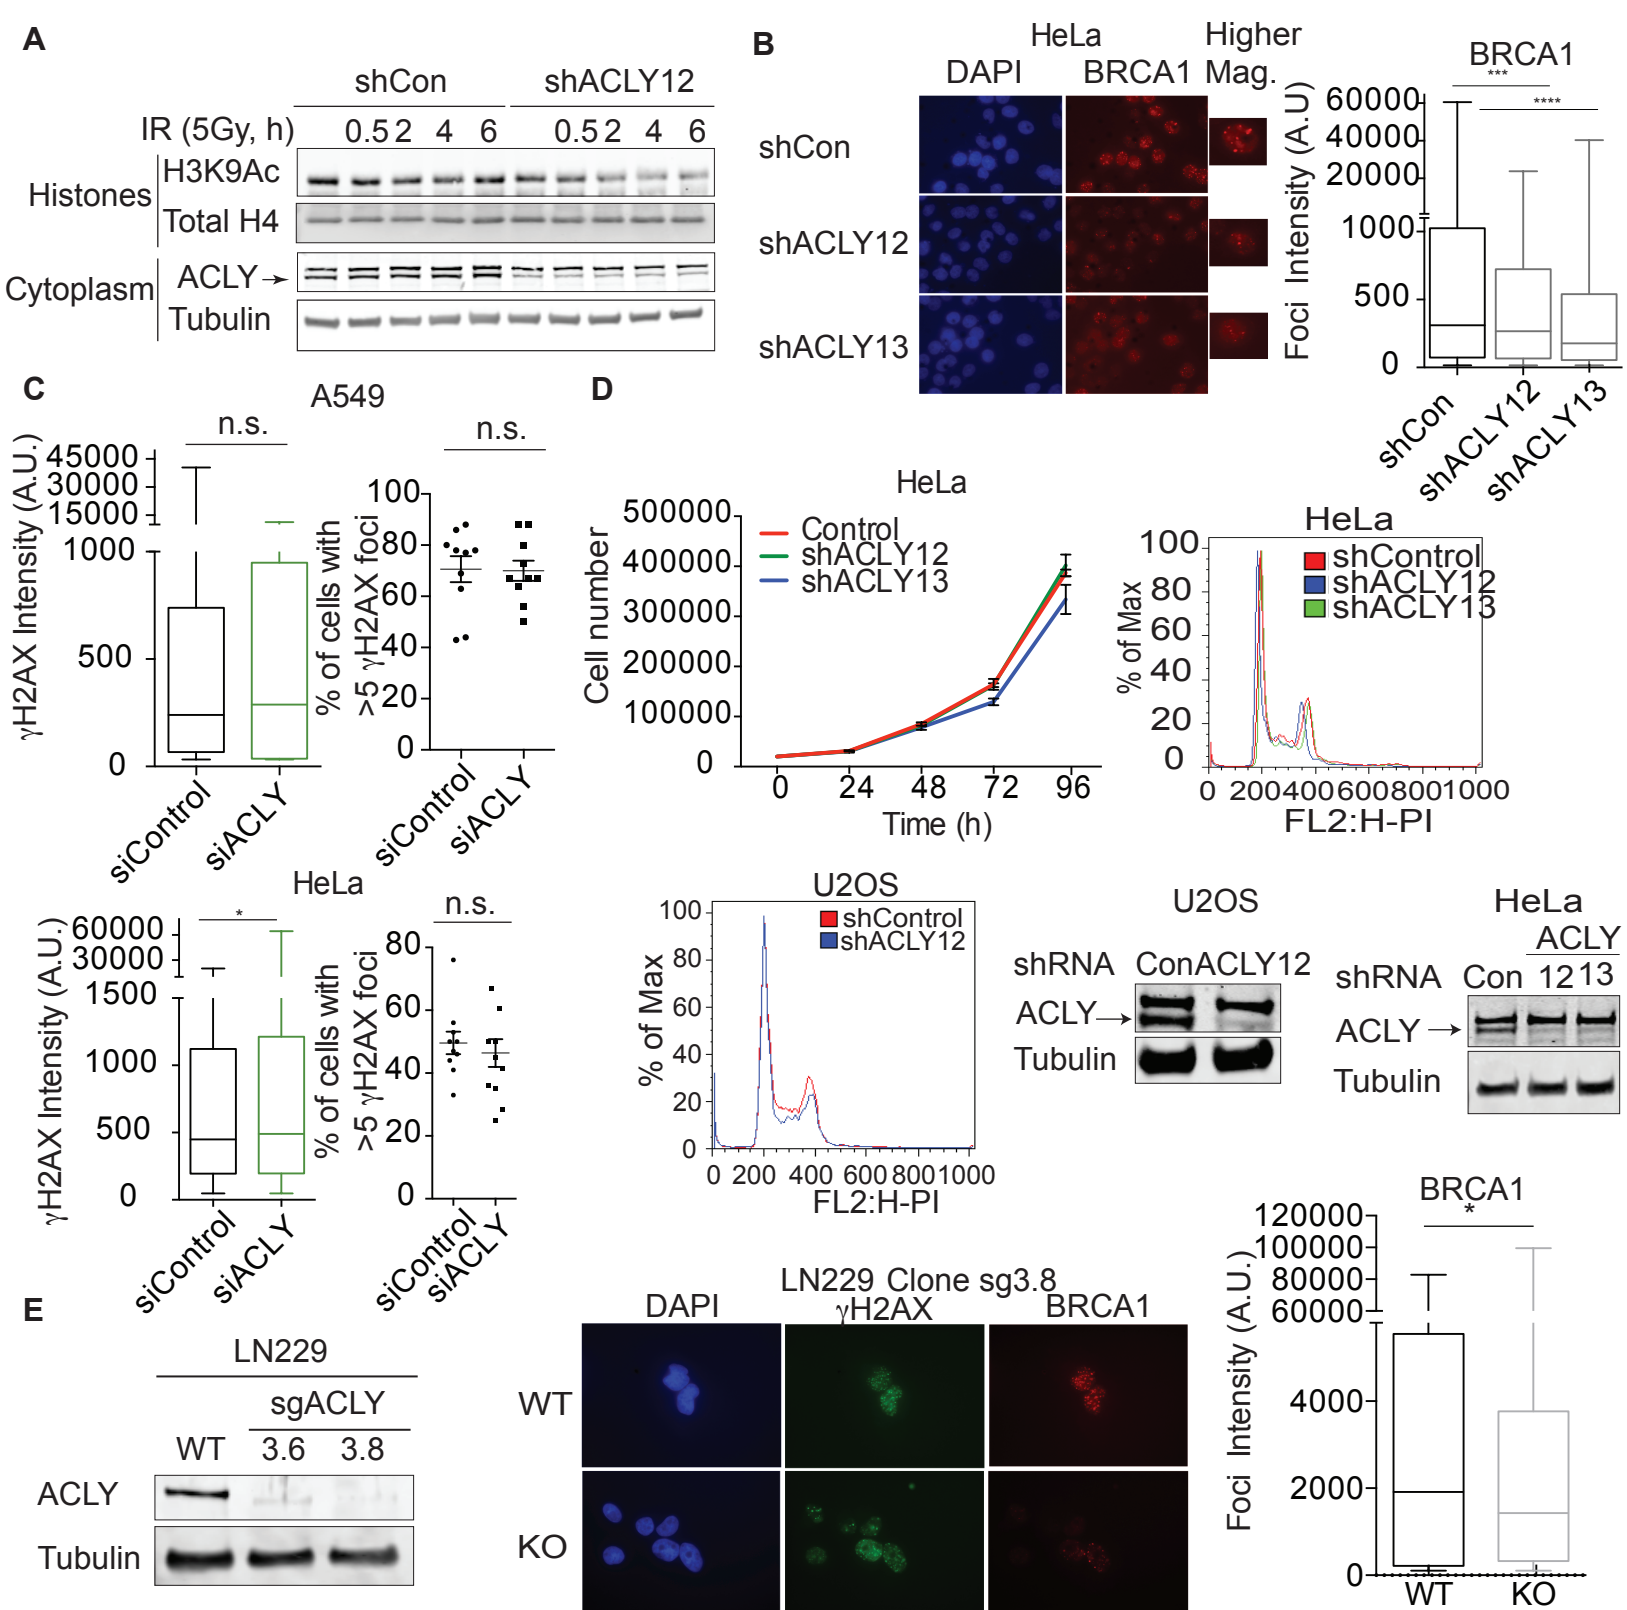

**Figure S1, Related to Figure 1. Validation of ACLY's role in BRCA1 recruitment and cell-cycle progression in ACLY silenced cells.**

(A) Histone acetylation was examined in cells after knockdown of ACLY with shRNA. Histones were acid extracted after indicated time following 5Gy IR and specific proteins examined by western blot. Cytoplasmic fraction was used to verify knockdown.

(B) BRCA1 recruitment was examined in HeLa cells with two different shRNA targeting ACLY. Quantification was performed in 10 fields. \*\*\*,  $p < 0.001$ , \*\*\*\*,  $p < 0.0001$ . A.U.- Arbitrary Units.

(C)  $\gamma$ H2AX levels and foci intensity was quantified under experimental conditions used in Figure 1C; left panel- bar and whisker (min to max) plot; right panel- mean  $\pm$  SEM; \*,  $p < 0.05$ . n.s.- not significant.

(D) Cell cycle profile in ACLY-silenced HeLa cells and U2OS cells as examined using propidium iodide staining. Proliferation curve (mean  $\pm$  SEM of triplicates) was performed by examining cell counts using hemocytometer.

(E) BRCA1 foci was quantified in control and ACLY KO LN229 cells from 5-10 fields; \*,  $p < 0.05$ . A.U.- Arbitrary Units. Data from 1 clone is depicted and was reproducible with both clones.



A

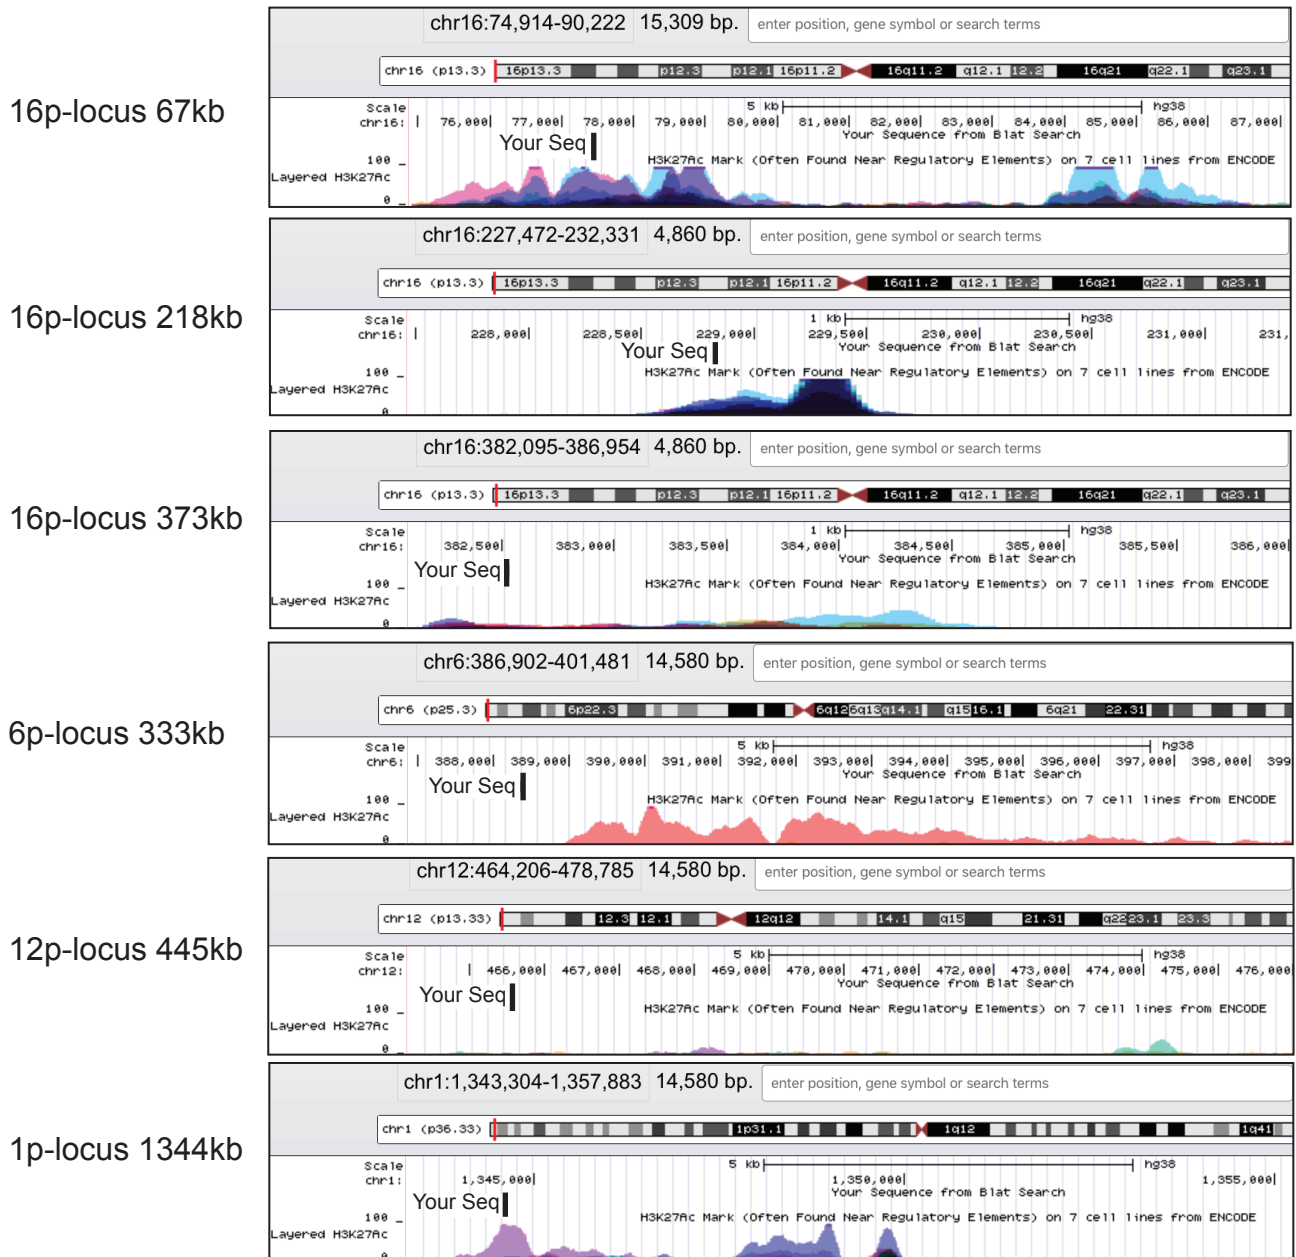

**Figure S3, Related to Figure 2. Schematic of primer design used in the U2OS TRF1-Fok1 ChIP.** (A) Location of the primer sequences (designated as Your Seq) used in the ChIP experiments generated using the UCSC Genome Browser. Peaks corresponding to ENCODE H3K27Ac is shown.

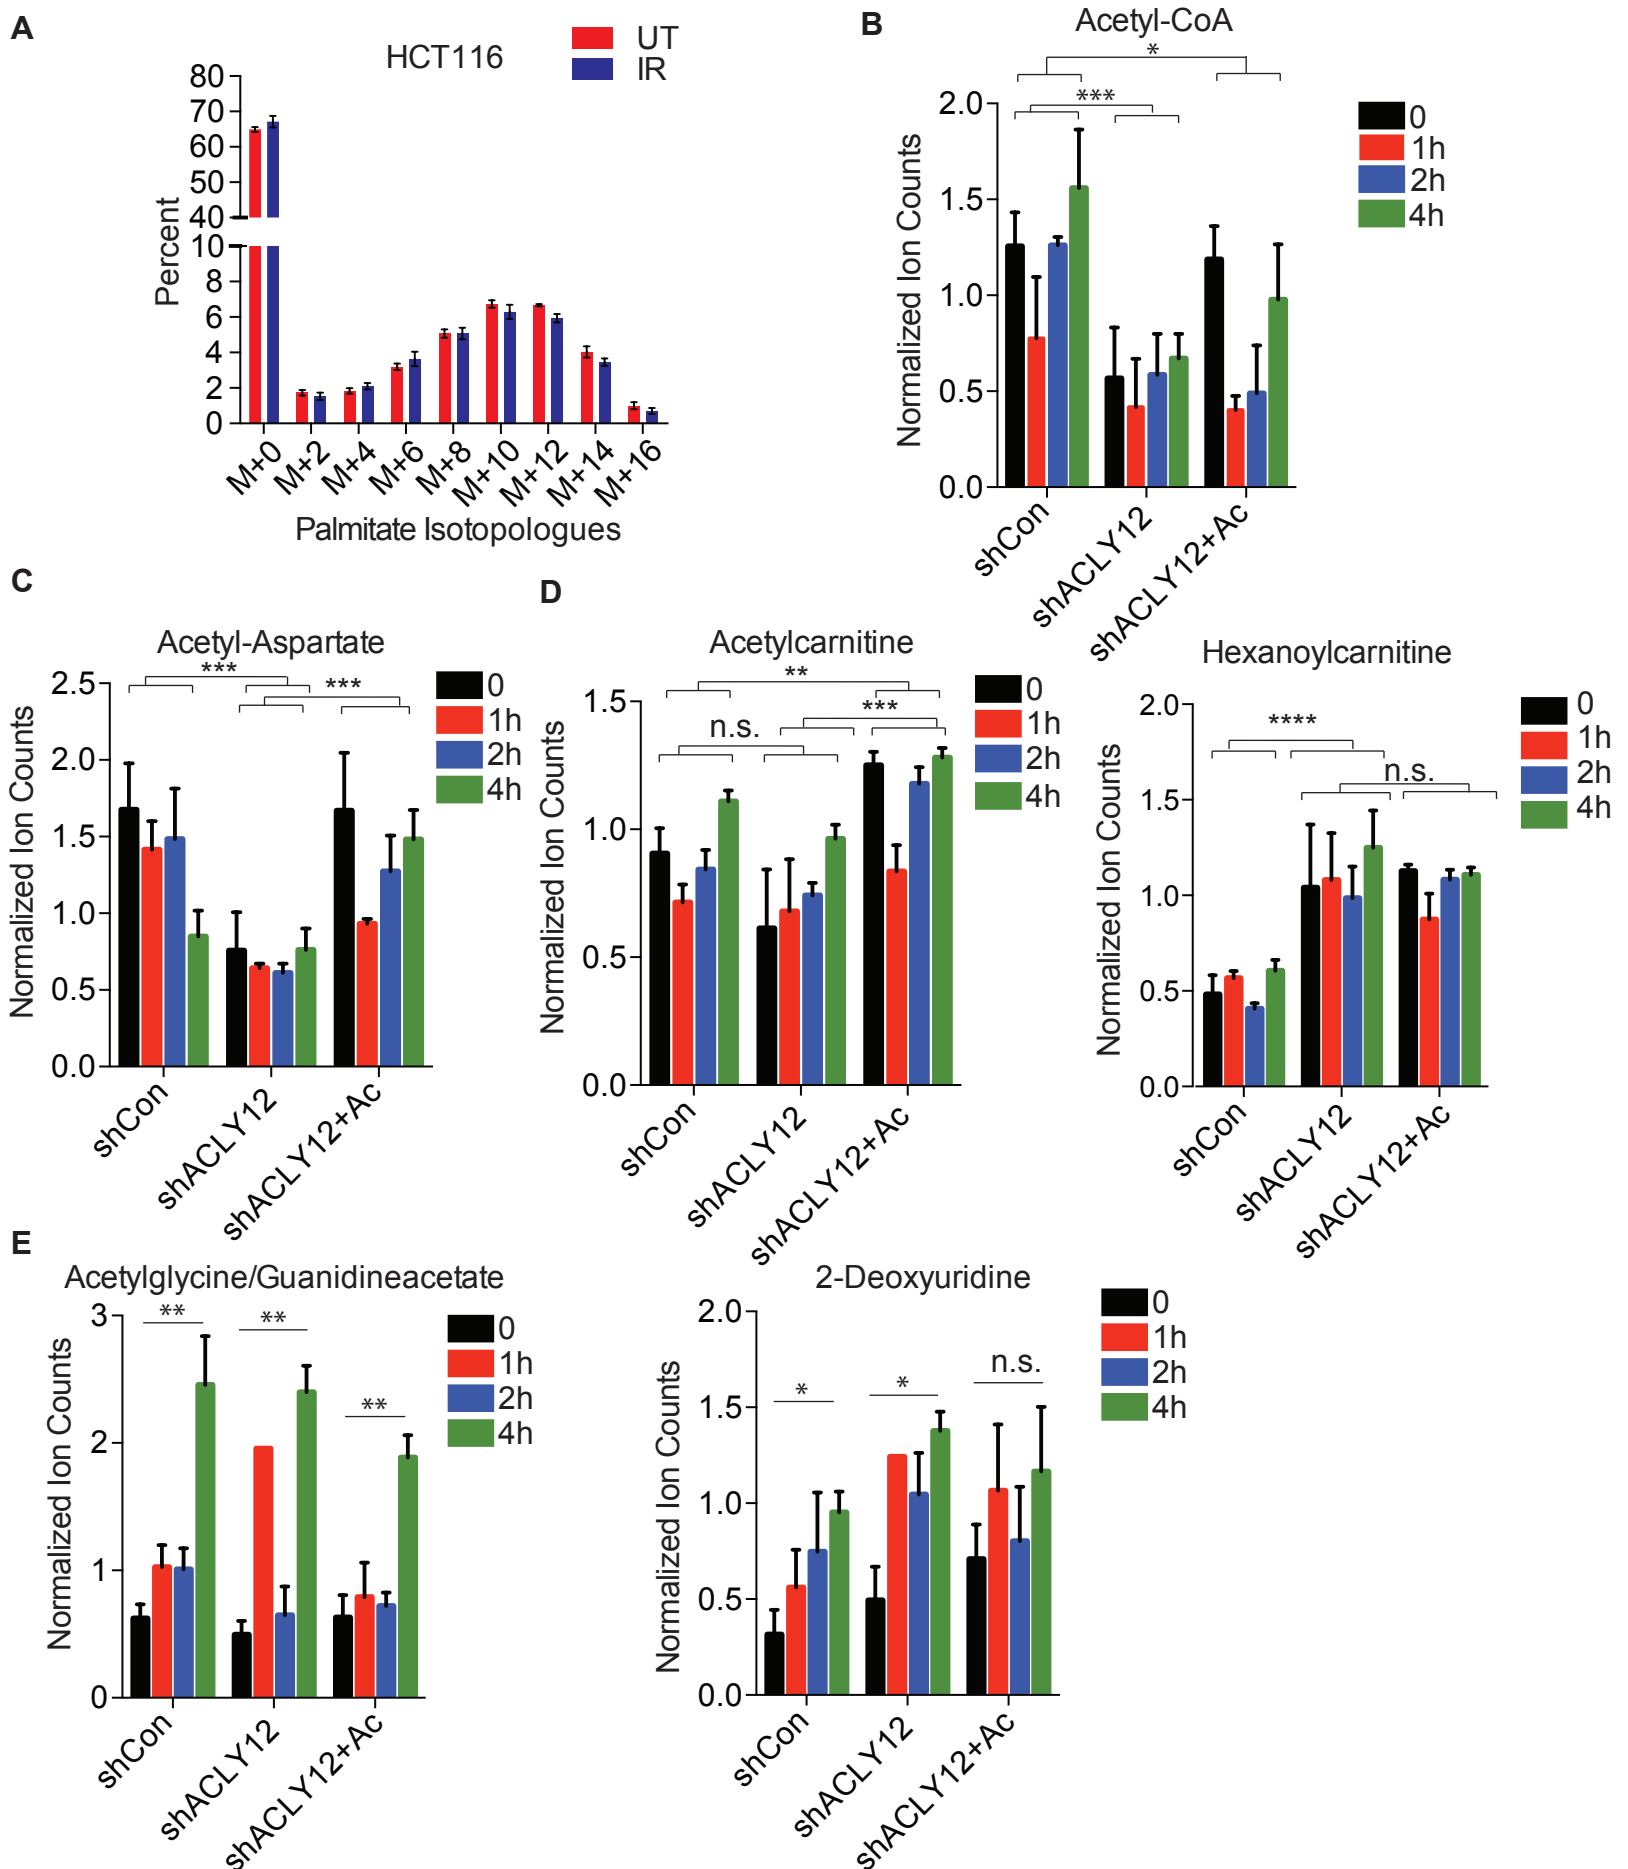

**Figure S4, Related to Figure 3. IR-dependent metabolic reprogramming does not account for ACLY's role in DNA repair.**

(A) HCT116 cells were plated in triplicate and treated with IR, followed by 24h <sup>13</sup>C-glucose labeling. Enrichment of palmitate was examined by fatty-acid methyl-ester analysis, mean +/- SEM of triplicates.

(B-E) Metabolites analyzed post 5Gy IR at indicated time points. \*, p<0.05, \*\*, p<0.01, \*\*\*, p<0.001, \*\*\*\*, p<0.0001 n.s.-not significant, mean +/- SEM of triplicates.



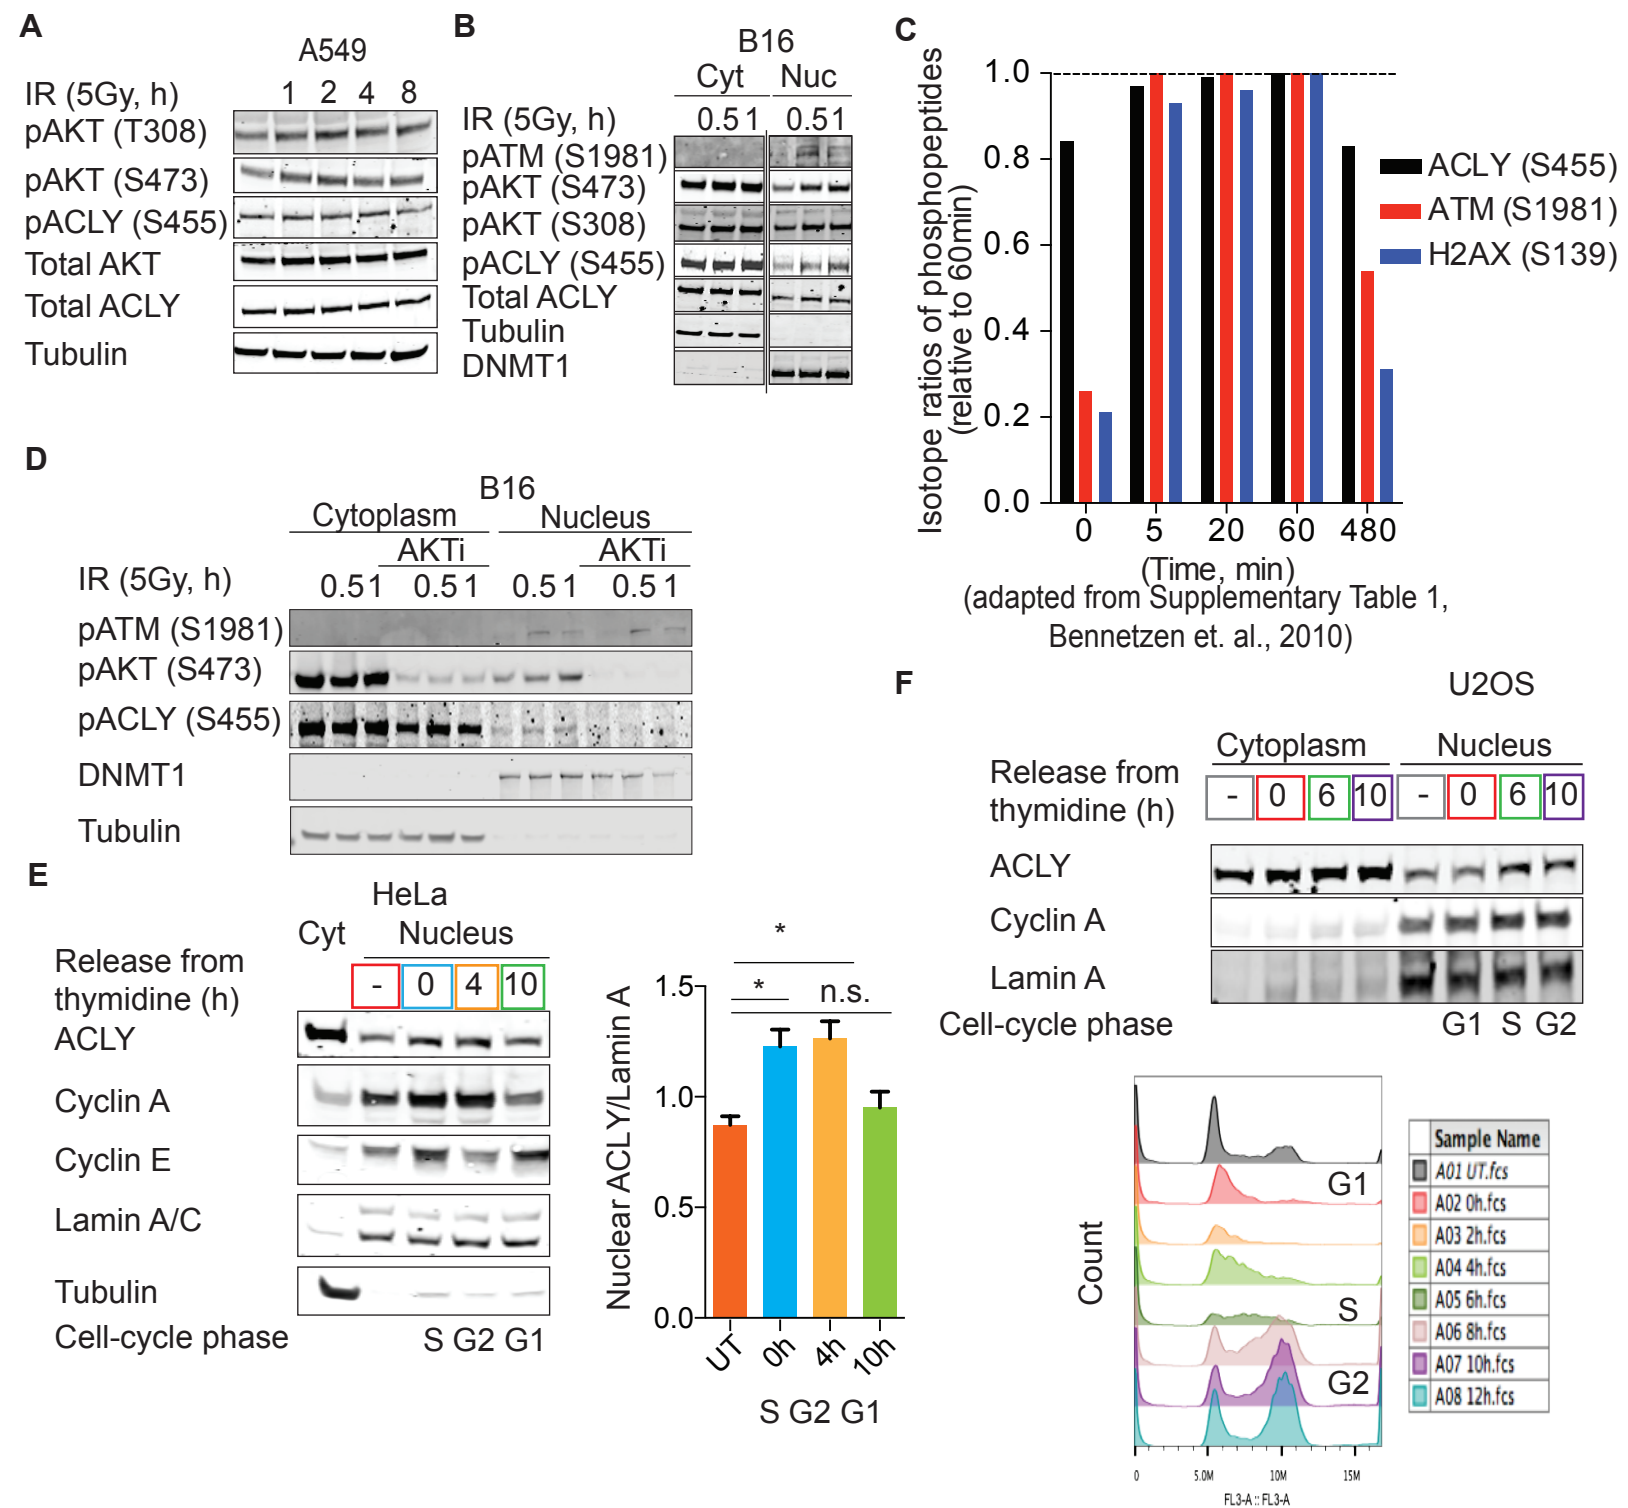

**Figure S5, Related to Figure 4. Phosphorylation of ACLY in response to IR and cell cycle regulation of nuclear ACLY.**

(A) A549 cells were treated with 5 Gy and whole cell lysates were harvested after indicated time points and protein levels were assayed by Western Blot.

(B) B16 cells were treated with 5 Gy IR, fractionated and protein levels assayed by Western Blot.

(C) Data re-graphed from Bennetzen et. al., 2010 depicting increase in phosphorylated levels of nuclear ACLY, ATM and  $\gamma$ H2AX following damage.

(D) Cells were pre-treated with an Akt inhibitor, MK-2206, for 1 h followed by IR treatment and western blotting of lysates at indicated time points.

(E) HeLa cells were synchronized in S-phase (0h) using a double thymidine block and released from S-phase by changing media. Lysates were fractionated and protein levels were assessed in cytoplasmic and nuclear fractions (left panel). See Figure 4E for corresponding PI profiles. Quantification of three experiments mean  $\pm$  SEM, \* $p$ <0.05. n.s.- not significant (right panel).

(F) U2OS cells were synchronized in G1 (0h) as in E, lysates fractionated and protein levels assessed by Western Blot (top panel). Propidium iodide staining was used to confirm cell cycle stage (bottom panel).

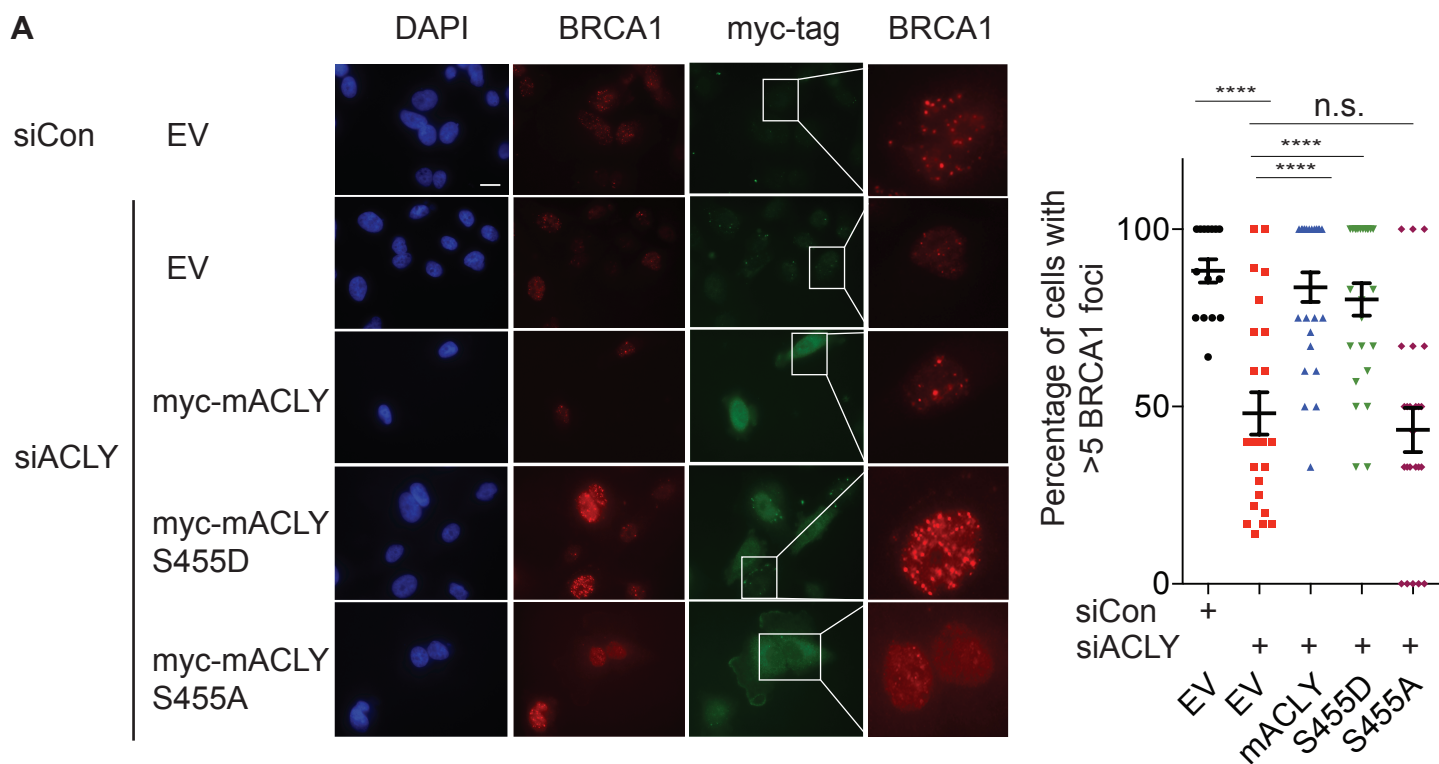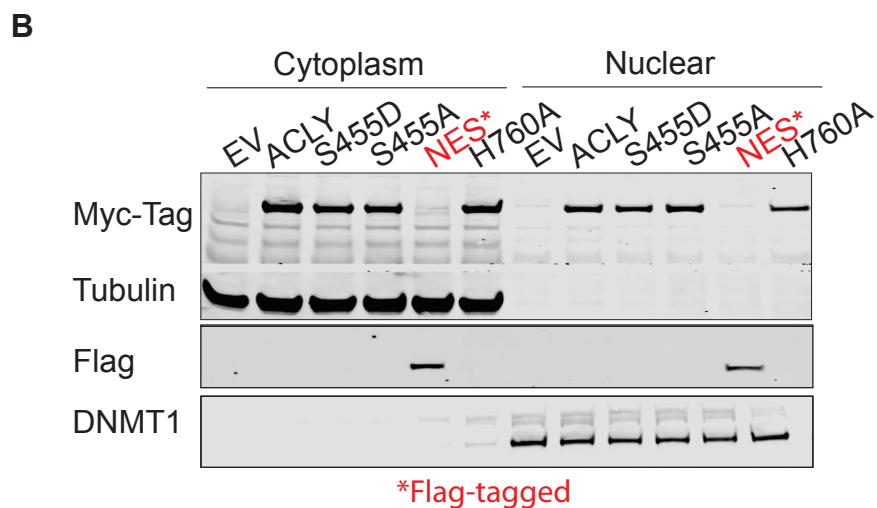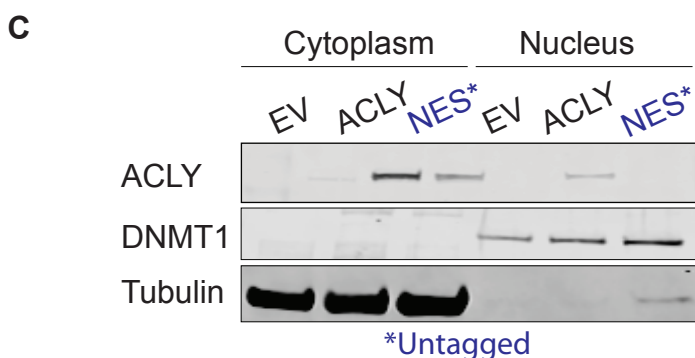

**Figure S6, Related to Figure 5. Validation of mACLY constructs and rescue experiment.**

(A) Immunofluorescence for BRCA1 and myc-tag following 2Gy IR in LN229 cells stably expressing mACLY constructs or EV with and without knockdown of hACLY using siRNA. Mean $\pm$ SEM, \*\*\*\* $p$ <0.0001, n.s.- not significant.

(B) Expression of mACLY constructs followed by fractionation and verification of localization of mACLY mutants to the nucleus and cytoplasm. Note that the flag tag version of mACLY-NES interfered with the nuclear exclusion of ACLY, thus untagged mACLY-NES was validated in panel C and subsequently used for experiments.

(C) Fractionation of cells in LN229 ACLY null cells depicting ACLY exclusion from the nucleus in cells expressing mACLY-tagged with NES.

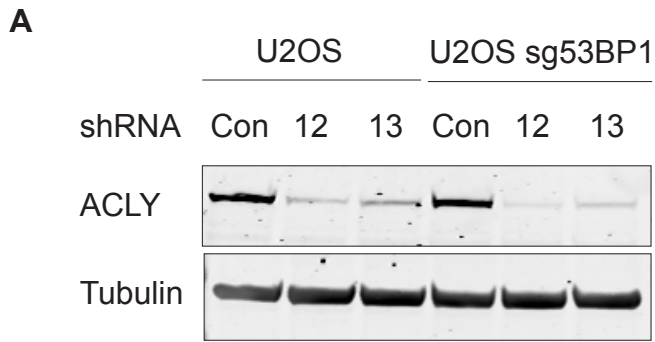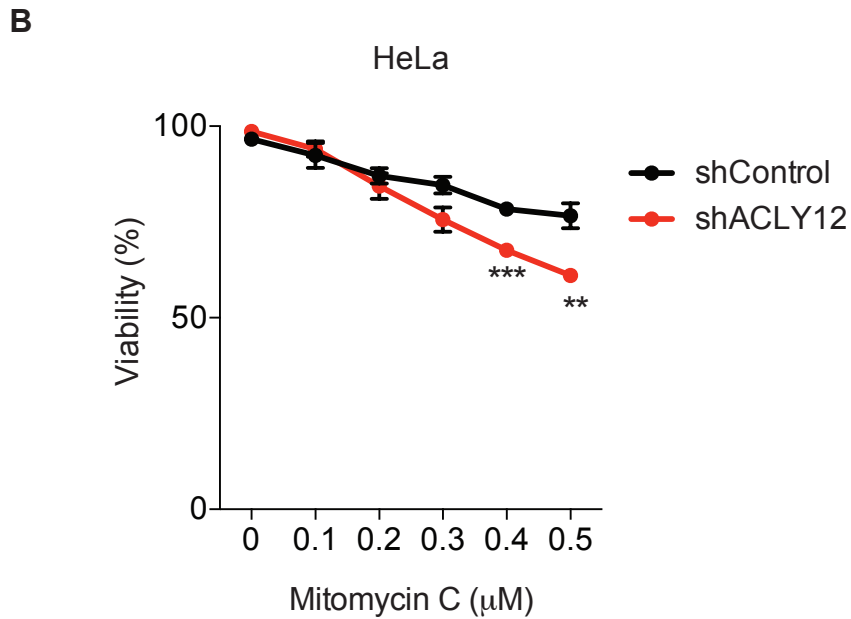

**Figure S7, Related to Figure 6: Verification of ACLY knockdown and sensitivity to mitomycin C.**

(A) Western blot depicting knockdown of ACLY in the U2OS cells.

(B) HeLa cells transduced with shControl or shACLY12 were treated with indicated concentration of mitomycin C for 48 h and cell viability determined by trypan blue exclusion. Mean  $\pm$  SEM. \*\*,  $p < 0.01$ , \*\*\*,  $p < 0.001$ .
